# Supplementary material
Source: publisher figshare collection journal article supplement (https://acs.figshare.com/ndownloader/files/24174075)
Supplement: Supplementary file 1 [file 24174075]

# Atomic-Scale Carving of Nanopores into a van der Waals Heterostructure with Slow Highly Charged Ions

Janine Schwestka,<sup>\*,†</sup> Heena Inani,<sup>\*,‡</sup> Mukesh Tripathi,<sup>‡</sup> Anna Niggas,<sup>†</sup> Niall McEvoy,<sup>¶</sup> Florian Libisch,<sup>§</sup> Friedrich Aumayr,<sup>†</sup> Jani Kotakoski,<sup>‡</sup> and Richard A. Wilhelm<sup>†,||</sup>

<sup>†</sup>*TU Wien, Institute of Applied Physics, Vienna, Austria*

<sup>‡</sup>*University of Vienna, Faculty of Physics, Vienna, Austria*

<sup>¶</sup>*Trinity College Dublin, AMBER School of Chemistry, Dublin, Ireland*

<sup>§</sup>*TU Wien, Institute for Theoretical Physics, Vienna, Austria*

<sup>||</sup>*Helmholtz-Zentrum Dresden-Rossendorf, Institute of Ion Beam Physics and Materials Research, Dresden, Germany*

E-mail: [schwestka@iap.tuwien.ac.at](mailto:schwestka@iap.tuwien.ac.at); [heena.inani@univie.ac.at](mailto:heena.inani@univie.ac.at); [wilhelm@iap.tuwien.ac.at](mailto:wilhelm@iap.tuwien.ac.at)

Supporting information

---

\*These authors contributed equally to the work

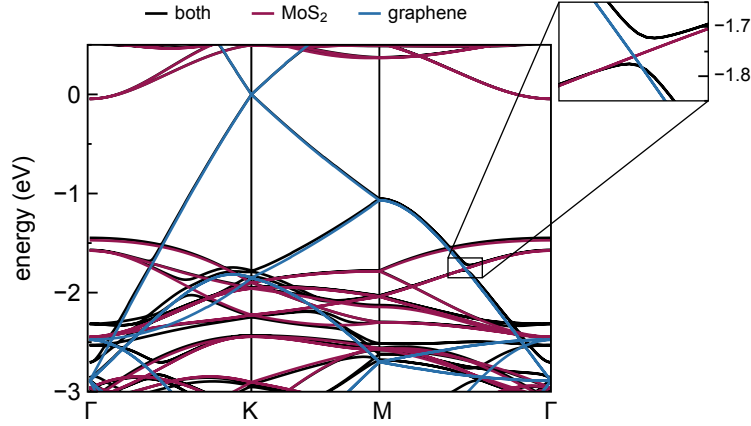

Figure 1: Band structure of a  $3 \times 3$  MoS<sub>2</sub> +  $4 \times 4$  graphene bilayer system from density functional theory (see methods). Band structures of the individual, separate layers are shown in red (MoS<sub>2</sub>) and blue (graphene). Changes in the bandstructure are minimal, with small avoided crossings (see zoom-in).

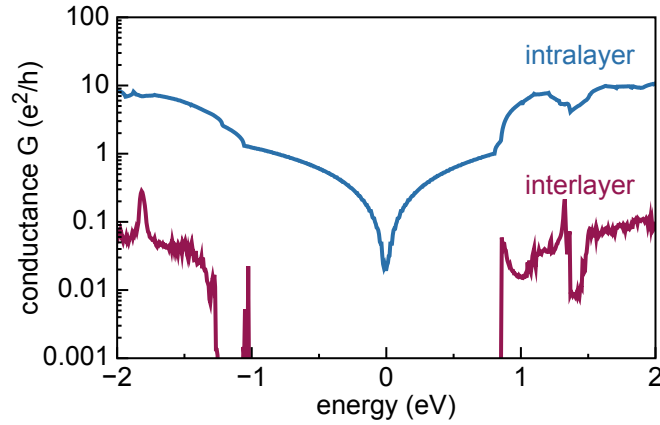

Figure 2: Intralayer conductance of graphene/MoS<sub>2</sub> heterostructure is at least two orders of magnitude larger than the interlayer conductance.
